# Supplementary material for: Bacteriophage cocktail for biocontrol of Escherichia coli O157:H7: Stability and potential allergenicity study
Source: PLoS One. 2018 May 15;13(5):e0195023. doi: 10.1371/journal.pone.0195023 (PMC5953568; doi:10.1371/journal.pone.0195023)
Supplement: S3 Table — (XLSX) [file pone.0195023.s003.xlsx]

## Sheet: S3 TABLE
S3 Table. Survival percentages of microencapsulated and free phages at -80°C and -20°C storage temperatures.
TEMPERATURE -80C
	0	1	7	30			0	1	7	30	DAYS
1	1	0.937299	0.899127	0.89109		1	1	0.855144	0.796919	0.816798
2	1	0.905948	0.81005	0.881311		2	1	0.894667	0.858847	0.788244
3	1	0.955638	0.848373	0.89233		3	1	0.905208	0.869812	0.833095
MEAN	1	0.932962	0.852517	0.888244		MEAN	1	0.885006	0.841859	0.812712
SD	0	0.0251271	0.0446825	0.00603589		SD	0	0.026393	0.0393039	0.0227028
MICROENCAPSULATED PHAGES						FREE PHAGES
TEMPERATURE -20C
	0	1	7	30			0	1	7	30	DAYS
1	1	0.968649	0.882084	0.887155		1	1	0.871178	0.893867	0.736757
2	1	0.968649	0.878079	0.895856		2	1	0.908811	0.895453	0.741988
3	1	0.905948	0.852977	0.882844		3	1	0.893052	0.88593	0.72398
MEAN	1	0.947749	0.871046	0.888618		MEAN	1	0.891014	0.89175	0.734242
SD	0	0.0362005	0.0157765	0.00662811		SD	1	0.0188989	0.00510217	0.00926407
MICROENCAPSULATED PHAGES						FREE PHAGES
